# Supplementary material for: Quantitative Analysis of Nighttime Effects of Radiation Belt Energetic Electron Precipitation on the D-Region Ionosphere during Lower Solar Activity Period
Source: Copernicus journal article supplement (doi:10.5194/egusphere-2025-878), 2025-03-04
Supplement: Supplementary file [file egusphere-2025-878-AC1-supplement.pdf]

## Response to Reviewer Comment

We greatly appreciate the reviewer's valuable comments and detailed feedback on our manuscript. The issues and suggestions raised have been instrumental in improving the overall quality and clarity of our work. We have carefully reviewed all comments and made comprehensive revisions, including unifying the notation used in equations, enhancing the readability of figures, and refining the text for greater clarity and accuracy. We are especially grateful for the reviewer's recognition of the scientific significance of our study on the effects of Energetic Electron Precipitation (EEP) on D-region ionization. We believe the revised manuscript has been significantly improved in both quality and readability.

1. Line 70: "However, the study on the global climatological characteristics of EEP effects is insufficient." Does this statement refer to the study of Renkwitz et al., 2023? If yes, it would be good to be more specific. Why is the study insufficient? Generally, the sentence could also be removed, as it contains no information.

We have removed this statement as suggested by the reviewer, as it does not add substantial information to the manuscript and may cause confusion regarding the work of Renkwitz et al., 2023.

2. Line 115: Fang et al. (2008, 2010) are referred to twice in one sentence. One time is enough. We have rewritten this sentence to eliminate the redundancy in Line 114 of the revised manuscript: "The Ionization class utilizes the models developed by Fang et al. (2008, 2010) to generate altitude profiles of ionization for ions and electrons."

3. Line 120: Reference style - "*Fang2010*"

We have corrected the inconsistent reference style to follow the journal's format in Lines 120 of the revised manuscript: "by inputting monoenergetic energy (keV), electron energy flux (erg/cm<sup>2</sup>/s), geographic coordinates, and the desired altitude range into the "*Fang2010*" model."

4. Line 121: "The Chemistry class contains the core of the GPI5 model (Glukhov et al., 1992)." The GPI5 model needs to be introduced. In line 113, PyGPI is introduced, which is the Python implementation of the GPI5 D-region and ionization chemistry model. Using the terms PyGPI5 and GPI5 without a clear explanation makes it sound like two models.

We have clarified the relationship between PyGPI5 and GPI5 in our manuscript. PyGPI5 consists of two main components: the Ionization class ("*Fang2010*" model) and the Chemistry class (GPI5 model). The workflow first uses the Fang2010 model in the Ionization class to calculate the ionization rate, which is then input into the GPI5 model to obtain the electron density profile. We have already made this clarification in lines 125-127 of our manuscript: "After inputting the ionization rate obtained from the "*Fang2010*" model and precipitation duration, the GPI5 model can produce the electron density profiles for a given location."

5. Line 125: "After inputting the ionization rate and precipitation duration, the model can produce the electron density profiles for a given location." Where did you get the ionization rate?

We have clarified the source of the ionization rate: "After inputting the ionization rate obtained from the *"Fang2010"* model and precipitation duration, the GPI5 model can produce the electron density profiles for a given location." We have revised the text in Lines 125-127.

6. Line 130: sentence duplication: "After inputting the ionization rate and precipitation duration, the model can produce the electron density profiles for a given location"

We have removed the duplicated sentence as pointed out by the reviewer.

7. Line 137: Please explain in some words the Liouville's theorem and how the equation (1) was derived from it.

Liouville's Theorem in Statistical Mechanics: In conservative systems, the phase space density remains constant along particle dynamical trajectories.

In space physics applications, this theorem leads to the important relationship between pitch angle ( $\theta$ ) distribution and magnetic field strength ( $B$ ):  $\sin^2\theta/B = \text{constant}$ , which forms the theoretical foundation for studying particle loss cone and particle trapping phenomena in space physics.

8. Line 140: "By calculating the loss cone angle at satellite altitudes (507 km,  $\alpha_{LC}$ )" Please insert the equation for loss cone angle.

Based on the pitch angle ( $\alpha_{507\text{km}}$ ) measured by the satellite and the magnetic field intensities ( $B_{507\text{km}}$ ,  $B_{100\text{km}}$ ) obtained from the IGRF model, we calculate  $\alpha_{100\text{km}}$  by applying Liouville's theorem. This calculation is presented in Equation 1, and we have accordingly modified previously ambiguous explanations to clarify this process. The revised text now reads: "By measuring pitch angle at the satellite altitude (507 km) and calculating the loss cone angle at atmosphere altitudes (100 km,  $\alpha_{LC}$ ), we can determine the electron fluxes that can precipitate into the atmosphere." We have revised the text in Lines 137-138.

9. Line 147: "To determine the cutoff frequency, we have improved the method of Toledo-Redondo et al. (2012), making it applicable to high-latitude regions." This sentence is confusing in this location. It can be removed since the topic is addressed later in the text (lines 163-165). We have removed the confusing sentence as suggested, as the topic is addressed later in the text.

10. Line 152:  $f_l = c/h'$  reference? In Saini (2010) the first order cut-off frequency looks different:  $f_c = c/(2*h')$  (<https://doi.org/10.1029/2009JA014795>) What causes the difference?

I apologize for the error. You're absolutely right about the first-order cutoff frequency formula. The correct formula is indeed  $f_c = c/(2*h')$ , as properly referenced in Saini (2010). Thank you for pointing out this discrepancy. The formula should be corrected to  $f_c = c/(2*h')$  to be consistent with the established literature in Saini (2010) and other sources. This was my typographical error, but I did actually use the correct formula  $f_c = c/(2*h')$  when calculating the cutoff frequency in the computations. We have revised the text in Line 148.

11. Line 155: "An increase in electron density lowers the reflection height." Inserting a reference would strengthen the statement.

We have added a reference: "An increase in electron density lowers the reflection height (Cheng et al., 2023; Gasdia and Marshall, 2023)." We have revised the text in Lines 150-151.

12. Line 160: "...and their downward propagation can influence the determination of the cutoff frequency." Inserting a reference would strengthen the statement.

We have added a reference: "In the magnetosphere, auroral hiss, chorus waves, and lower hybrid electrostatic noise also exist, and their downward propagation can influence the determination of the cutoff frequency (Martinez-Calderon et al., 2015; Yu et al., 2023)." We have revised the text in Lines 155-156.

13. Line 149: Please explain in short words QTM1 and QTME.

QTM1 and QTEM are two characteristic electromagnetic wave propagation modes in the Earth-ionosphere waveguide, with their key differences primarily manifested in frequency range applicability and field structure. The QTM1 mode primarily operates in the extremely low frequency (ELF) band of 300Hz to 1.8kHz, featuring horizontally distributed magnetic fields and significantly vertical electric field components. This unique field configuration enables exceptionally low propagation loss, allowing ultra-long-distance transmission over thousands of kilometers with the capability to penetrate seawater, making it widely applicable in military domains such as submarine communications. In contrast, the QTEM mode dominates the high-frequency band above 1.8kHz, with both electric and magnetic fields exhibiting horizontal distribution, and its propagation characteristics more closely resemble free-space waves. Although it offers relatively shorter propagation distances and greater attenuation, it is better suited for medium-to-short-range communication needs such as shortwave broadcasting and aeronautical communications. These two modes exhibit a distinct transition zone around 1.6-1.8kHz, where this critical frequency fluctuates with solar activity and geomagnetic field variations. We insert references in Line 146 to strengthen the statement (Toledo-Redondo et al., 2012; Ramo et al., 1994).

14. Line 170: What window/kernel size and iteration step did you use? Why did you choose that specific window/kernel size? Please be more specific; the description is quite general.

We used a window/kernel size of 45 for our analysis. This parameter was determined through repeated experimental testing of the data. The window size of 45 was chosen because it effectively locates the minimum points in the waveform while avoiding excessive smoothing of the wave trend line. Smaller windows might result in noise interference, while larger windows could cause important features to be over-smoothed and lost.

15. Line 172-176: Why did you choose a different approach in the second step? Why didn't you use fftconvolve in the first step since it is more computationally efficient (as it is written in lines 174-175)?

We sincerely appreciate the reviewer's insightful question. Regarding the rationale behind employing a two-step smoothing approach (using convolve in the first step and fftconvolve in

the second), the core objective of this processing workflow is to accurately identify the local minima of ELF wave energy (i.e., the cutoff frequency). Our detailed explanation is as follows:

The initial step utilizes `convolve` for moving average smoothing, which effectively removes high-frequency noise while preliminarily extracting the primary signal trend. However, the results from this first-step smoothing alone are insufficient to precisely determine the desired trendline (particularly for identifying energy minima), as residual noise or local fluctuations may still interfere with minimum value detection. Therefore, we implement a secondary processing step employing Fast Fourier Transform-based convolution (`fftconvolve`) on the initially smoothed data to more efficiently suppress residual noise and ensure both the smoothness and reliability of the trendline.

The ELF wave energy minima (cutoff frequencies) extracted through this method demonstrate excellent agreement with the global statistical results obtained by Toledo-Redondo et al. using DEMETER satellite data (as shown in Figure 1). This consistency validates the effectiveness of our approach, confirming that the two-step smoothing strategy successfully preserves the physical characteristics of the signal while meeting practical application requirements.

We will further emphasize the importance of this method in accurately determining energy minima in the manuscript and make revisions in Lines 165-169.

#### 16. Line 176: Trend line extraction clarification

Thank you for your correction. This sentence is indeed unclear. Your understanding is correct - the smoothed line is the trend line, and there is no additional extraction step. The sentence can be revised to: "After these two smoothing steps, we obtain the smoothed curve of the ELF wave." which is more direct and clear. The term "trend line" can indeed cause confusion, as it is simply the smoothed curve obtained through the two-step smoothing process. We have revised the text in Lines 169-170.

17. Figure 1, caption: "...and the red dots indicate the cutoff frequency..." There is only one red dot.

Thank you for your correction. We have revised the caption.

18. Line 191: "... (Shown in Fig. 2)" No capitalisation at this point.

Thank you for the feedback. The capitalization issue has been corrected in Line 184.

19. Figure 2: Confusing order of panels. 1500 keV is larger than 1 MeV; why is it in the middle? Switching between 1 MeV and 1500 keV is not consistent. Either 1000 keV and 1500 keV or 1 MeV and 1.5 MeV.

Thank you for your feedback. The issue with the panel order in Figure 2 has been addressed, and the sequence has been corrected for consistency. The 1500 keV has been revised as 1.5 MeV and is now placed in the correct position relative to 1 MeV, ensuring clarity. We appreciate your suggestion and have made the necessary adjustments.

20. Please add some short words about what information we gain from Figure 2. Why did you choose 1 MeV and 1.5 MeV, as they are so close and there is no significant difference? Why is it essential for the study?

Figure 2 is designed to verify the temporal variations of electrons at different energy levels and to demonstrate that the effects of particle precipitation reach a steady state after 3600s. This verification is crucial for our study because electrons at different energy levels affect ionization rates at different altitudes. The observed minimal difference between 1 MeV and 1.5 MeV electrons can be attributed to their relatively similar altitude ranges of influence and ionization effects. Therefore, it can be inferred that the effect of higher energy level electrons on the electron density in the D-region may be closer to that of 1 MeV electrons.

21. Line 212-214: There is a dot and a space in the brackets by mistake. It would be nice if equation (3) showed the formula described. However, it shows the formula that has already been rearranged according to the plasma frequency (it is not wrong, but inaccurate).

We have removed the extra dot and space, thank you for your suggestion.

22. Line 216: Where is the  $h'$  in the equation? Is  $z=h'$ ? Please add a reference for equation 4.

23. Line 221: Please insert reference for equation (5).

24. In equation (6) it says  $z$  and not  $h'$ . Notation is not consistent.

25. Line 225-226: "Here,  $N_e$  is the corresponding electron density (in  $\text{cm}^{-3}$ ), which can be obtained from the PyGPI5 simulations,  $f_1$  is the cutoff frequency calculated from modelled electron density profile. derived from observations,  $h'$  is the reflection height (in km)."

We sincerely appreciate the reviewer's careful reading and constructive suggestions. We have revised the relevant text as follows to improve clarity and precision:

In the equation (4) and (6),  $z$  refers to the general altitude, while  $h'$  represents the reflection height at a specific frequency. We have corrected the issue of  $z$  and  $h'$  in the text and inserted references. The revised content for lines 213-214: "and  $z$  is the altitude in kilometres. when discussing specific reflection heights at a particular frequency,  $h'$  will be used." The revised content for lines 220-223: " In this formulation,  $N_e(z)$  represents the electron density (in  $\text{cm}^{-3}$ ) at reflection height  $z$ , obtained from PyGPI5 simulations. The cutoff frequency  $f_1$  corresponds to the wave frequency that is reflected at a specific height  $z$ . Using equation 6,  $h'$  can be determined by finding the height  $z$  at which the calculated cutoff frequency matches the observed  $f_1$  from CSES EFD measurements."

26. Figure 3: Same problem as in Figure 2. Confusing order of panels and switching between keV and MeV.

We sincerely appreciate the reviewer's valuable feedback regarding Figure 3. We have carefully addressed the concerns about panel organization and energy unit consistency through the modifications.

27. Line 265-267: "The X-rays are generated through bremsstrahlung radiation of precipitation electrons with air molecules, which occurs deep in the atmosphere. The electrons that produce these bremsstrahlung X-rays are indeed precipitation ones." Please rephrase the sentences and add references.

We have modified the sentences to read: " The X-rays are generated through bremsstrahlung radiation of precipitation electrons with air molecules, which occurs deep in the atmosphere (Xu et al., 2020)." We have revised the text in Lines 261-263.

28. Lines 263-269: The discussion should also mention the low reflection height in  $0^{\circ}$ -( $45^{\circ}$ ) longitude in Fig. 4e, whereas there is no notable X-ray rate in this area (Fig. 4c). Moreover, the discussion should include the striking high X-ray rate from  $0^{\circ}$ - $70^{\circ}$  longitude in Fig. 4d, while the reflection height is only slightly decreased from  $45$ - $90^{\circ}$  longitude (Fig. 4f).

We thank the reviewer for this insightful observation. We have incorporated a detailed discussion of the phenomenon mentioned in the  $0^{\circ}$ - $45^{\circ}$  longitude region where there is low reflection height (Fig. 4e) despite no notable X-ray rate (Fig. 4c).

we have further addressed the phenomenon in the  $0^{\circ}$ - $45^{\circ}$  longitude region in Lines 280-282: "In the Northern Hemisphere, within the region of  $0^{\circ}$ - $45^{\circ}$  longitude and  $40^{\circ}$ - $50^{\circ}$  latitude, the underlying reason is that this area lies within the Inter-Tropical Convergence Zone, where the ionosphere is highly variable and exhibits the highest occurrence of plasma bubbles (Kil and Heelis, 1998; Su et al., 2006; Toledo-Redondo et al., 2012)."

Regarding the strikingly high X-ray flux observed in the  $0^{\circ}$ - $70^{\circ}$  longitude region, we believe this phenomenon may be related to the South Atlantic Anomaly (SAA). In the observations from the CSES satellite at an altitude of 507 km, we detected a significant enhancement in electron flux within this region. As shown in Fig. 1, both high-energy electrons (2.9–3 MeV) and medium-energy electrons (0.5–0.7 MeV) exhibit strong fluxes within the  $0^{\circ}$ - $70^{\circ}$  longitude range. We hypothesize that this may be associated with the weakened geomagnetic field within the SAA region.

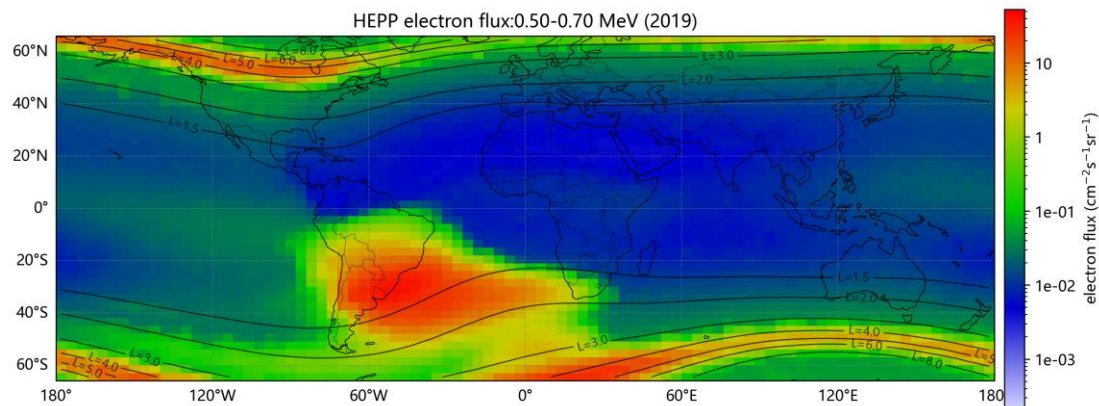



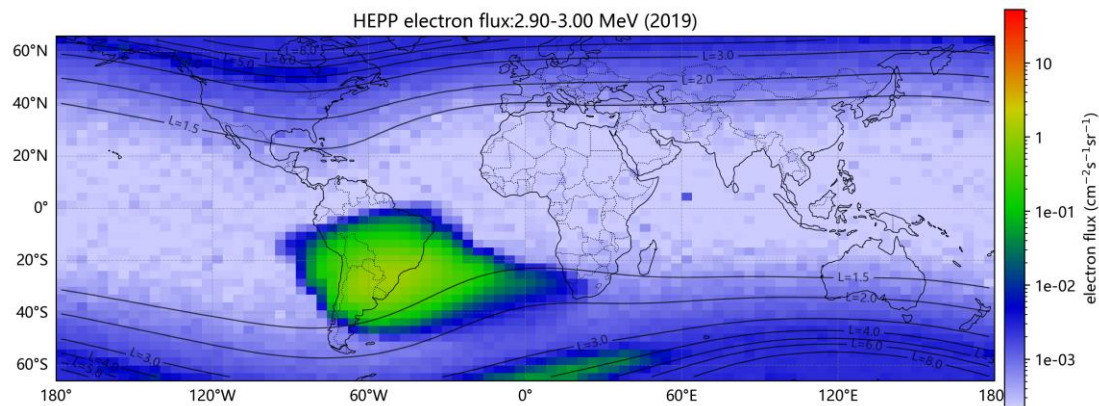

Figure 1. Average Electron Flux in 2019

Moreover, according to the study by Toledo et al. (2012), the SAA does not show significant changes in reflection height during high-energy electron precipitation events. Therefore, the mechanisms potentially influencing the  $0^{\circ}$ – $70^{\circ}$  longitude region near the SAA may be similar to those observed within the SAA itself. Given the complexity of the SAA, we divided the Southern Hemisphere into two regions for analysis:  $0^{\circ}$ – $60^{\circ}$  longitude (affected by the SAA) and  $60^{\circ}$ – $180^{\circ}$  longitude (unaffected by the SAA). As for why the reflection height in the  $0^{\circ}$ – $60^{\circ}$  region is only slightly decreased despite the strong electron and X-ray flux, we have included this phenomenon in our future research plans. Further simulations and data analysis will be conducted to explore the underlying mechanisms.

29. Line 279: Please describe Moran's I shortly. Why did you choose that approach, and what information is provided (e.g., Positive/negative correlation-> cumulation, dispersion, information from the value of Moran score)?

Moran's I is a spatial autocorrelation statistical method used to measure the degree of clustering or dispersion of data in space. We chose this method because it effectively quantifies the correlation between X rays, precipitated electrons and reflection height in the spatial distribution.

The values of Moran's I typically range from -1 to +1:

- Positive values (close to +1) indicate positive correlation.
- Negative values (close to -1) indicate negative correlation.
- Values close to zero indicate no apparent correlation.

We have revised Lines 274-275

30. Line 294: A comparison with other studies would strengthen the conclusion.

We appreciate this valuable suggestion and have added comparisons with several related studies to strengthen our conclusions regarding the relationship between electron flux, X-ray intensity, and changes in reflection height. The following paragraph has been added in Lines 294-300: "PyGPI5 model simulations show that energetic electrons precipitate to altitudes of 60-90 km (Fang et al., 2010). Xu and Marshall (2019) demonstrated that these precipitating electrons produce bremsstrahlung X-rays which can be backscattered and detected by satellites, while also increasing the electron density in the lower ionosphere. This increase in electron density leads to a decrease in the reflection height, which aligns with our observations. Chen et al.

(2023) quantitatively analyzed the global changes in electron density through a simulation. Our study combined the satellite observation of electron precipitation, X-ray, and ionospheric reflection height changes, and these three variables showed high correlation through spatial correlation analysis."

31. Figure 5: The font in the legend is too small. The text is not readable.

We sincerely appreciate the reviewer's careful observation regarding Figure 5. We have made the improvements to address the readability issues.

32. Line 345-346: "The X-ray measurements show that more ionization occurs in the Northern Hemisphere (mean X-ray rate is 78.8 counts/s), compared to the Southern Hemisphere (60°-180° longitude, mean X-ray rate is 71.2 counts/s)." Where did you get the X-ray rates?

We appreciate the reviewer's question regarding the X-ray rates mentioned in Lines 350–351. "Therefore, we also calculated the average X-ray rates in the above-mentioned region of the Northern and Southern Hemispheres using the X-ray detector onboard the CSES satellite.."

33. Line 348-349: "The possible reason for the discrepancy is that the  $h'$  in the WS formula (Method 1) serves as only a rough approximation of the reflection height, rather than the actual reflection height." Could one possible reason be that the Wait and Spies formula refers to VLF/LF waves? You compare with reflection heights of ELF waves, which, assumably, are lower by nature. Perhaps comparing the qualitative behavior as a function of the EPP at different energies is more meaningful than lookin at the quantitative differences.

The WS (Wait and Spies) formula is an empirical model used to fit the electron density profile of the ionospheric D-region. The reflection height  $h'$  defined in the formula does not represent the actual reflection height of electromagnetic waves, but rather serves as a fitting parameter to derive the electron density distribution. Therefore, there is indeed a discrepancy between the defined  $h'$  and the actual wave reflection height. However, since the WS formula provides a good approximation of the D-region electron density profile, the estimated  $h'$  still shows qualitative consistency with the actual reflection height.

In addition, the reviewer made an excellent point that the WS formula was originally developed for VLF/LF wave propagation, whereas in our study we are discussing the reflection heights of ELF waves, which are generally lower by nature. This difference in wavebands could indeed contribute to the quantitative discrepancy. As suggested, comparing the qualitative behavior of reflection height as a function of energetic particle precipitation (EPP) at different energies may be more meaningful than focusing solely on quantitative differences. We sincerely appreciate the reviewer's valuable suggestion and plan to explore this aspect further in future research.

34. Line 352: "These variations can fluctuate significantly, sometimes by several hundred percent." Please insert a reference. Furthermore, it should be discussed, that both methods use the electron density profile from PyGDI5 what bases on IRI. Does IRI have any limitations?

We sincerely appreciate the valuable comments provided by the reviewer. We have inserted the references as requested. Additionally, we acknowledge the limitations of the IRI model when used as the basis for the electron density profile in PyGPI5. While IRI performs well in many



applications, it has known limitations in the lower ionosphere region. For example, the IRI model struggles to capture the fine spatial variations in electron density at low altitudes, particularly with respect to geographic location (Toledo et al., 2012). Moreover, during solar activity peaks, the IRI model may not fully reflect the dynamic response of the lower ionosphere to solar cycle variations (Zhao et al., 2024). These model limitations may be one of the reasons for the discrepancies observed in our simulations, and we have discussed this in the revised manuscript in Lines 358-365: "These variations can fluctuate significantly, sometimes by several hundred percent (Sheese et al., 2011; Emmert et al., 2021). Additionally, both methods rely on the electron density profile obtained from the PyGPI5 model, which is based on the IRI (International Reference Ionosphere) model. However, the IRI model has limitations, particularly in capturing the variations in electron density in the lower ionosphere. For example, IRI struggles to accurately reflect the spatial variations in electron density with respect to latitude and longitude, especially in the lower ionospheric layers (Toledo-Redondo et al., 2012). Furthermore, the IRI model's representation of electron density in the lower ionosphere may not fully capture the dynamic changes associated with the solar cycle, which could influence the results (Zhao et al., 2024)."

35. Figure 6 e-h: The font of the information test below the title is too small. Text not readable. Thank you for your comment. We have increased the font size of the text below the title to ensure it is now readable.

36. Figure 7: The caption says "quiet conditions," but the legend denotes "Peace." Please be more consistent with the notation. I prefer quiet conditions.  
We appreciate your feedback. We have updated the legend to read "quiet conditions" to maintain consistency with the caption.

## References

- Cheng, W., Xu, W., Gu, X., Wang, S., Wang, Q., Ni, B., Lu, Z., Xiao, B., and Meng, X.: A Comparative Study of VLF Transmitter Signal Measurements and Simulations during Two Solar Eclipse Events, *Remote Sensing*, 15, 3025, 2023.
- Emmert, J. T., Drob, D. P., Picone, J. M., Siskind, D. E., Jones Jr., M., Mlyneczek, M. G., Bernath, P. F., Chu, X., Doornbos, E., Funke, B., Goncharenko, L. P., Hervig, M. E., Schwartz, M. J., Sheese, P. E., Vargas, F., Williams, B. P., and Yuan, T.: NRLMSIS 2.0: A Whole-Atmosphere Empirical Model of Temperature and Neutral Species Densities, *Earth and Space Science*, 8, e2020EA001321, <https://doi.org/10.1029/2020EA001321>, 2021.
- Fang, X., Randall, C. E., Lummerzheim, D., Wang, W., Lu, G., Solomon, S. C., and Frahm, R. A.: Parameterization of monoenergetic electron impact ionization, *Geophysical Research Letters*, 37, <https://doi.org/10.1029/2010GL045406>, 2010.
- Gasdia, F. and Marshall, R. A.: A Method for Imaging Energetic Particle Precipitation With Subionospheric VLF Signals, *Earth and Space Science*, 10, e2022EA002460, <https://doi.org/10.1029/2022EA002460>, 2023.
- Kil, H. and Heelis, R. A.: Global distribution of density irregularities in the equatorial ionosphere, *Journal of Geophysical Research: Space Physics*, 103, 407-417, <https://doi.org/10.1029/97JA02698>, 1998.

Martinez-Calderon, C., Shiokawa, K., Miyoshi, Y., Ozaki, M., Schofield, I., and Connors, M.: Polarization analysis of VLF/ELF waves observed at subauroral latitudes during the VLF-CHAIN campaign, *Earth, Planets and Space*, 67, 21, 10.1186/s40623-014-0178-7, 2015.

Ramo, S., Whinnery, J. R., and Van Duzer, T.: *Fields and Waves in Communication Electronics*, Wiley 1994.

Sheese, P. E., McDade, I. C., Gattinger, R. L., and Llewellyn, E. J.: Atomic oxygen densities retrieved from Optical Spectrograph and Infrared Imaging System observations of O<sub>2</sub> A-band airglow emission in the mesosphere and lower thermosphere, *Journal of Geophysical Research: Atmospheres*, 116, <https://doi.org/10.1029/2010JD014640>, 2011.

Su, S.-Y., Liu, C. H., Ho, H. H., and Chao, C. K.: Distribution characteristics of topside ionospheric density irregularities: Equatorial versus midlatitude regions, *Journal of Geophysical Research: Space Physics*, 111, <https://doi.org/10.1029/2005JA011330>, 2006.

Toledo-Redondo, S., Parrot, M., and Salinas, A.: Variation of the first cut-off frequency of the Earth-ionosphere waveguide observed by DEMETER, *Journal of Geophysical Research: Space Physics*, 117, <https://doi.org/10.1029/2011JA017400>, 2012.

Xu, W. and Marshall, R. A.: Characteristics of Energetic Electron Precipitation Estimated from Simulated Bremsstrahlung X-ray Distributions, *Journal of Geophysical Research-Space Physics*, 124, 2831-2843, 10.1029/2018ja026273, 2019.

Xu, W., Marshall, R. A., Tyssøy, H. N., and Fang, X.: A Generalized Method for Calculating Atmospheric Ionization by Energetic Electron Precipitation, *Journal of Geophysical Research: Space Physics*, 125, e2020JA028482, <https://doi.org/10.1029/2020JA028482>, 2020.

Yu, X., Yuan, Z., Yu, J., Wang, D., Deng, D., and Funsten, H. O.: Diffuse auroral precipitation driven by lower-band chorus second harmonics, *Nature Communications*, 14, 438, 10.1038/s41467-023-36095-x, 2023.

Zhao, S., Liao, L., Shen, X., and Lu, H.: Solar Cycle Variation of Radiated Electric Field and Ionospheric Reflection Height Over NWC Transmitter During 2005–2009: DEMETER Spacecraft Observations and Simulations, *Journal of Geophysical Research: Space Physics*, 129, e2023JA032282, <https://doi.org/10.1029/2023JA032282>, 2024.
